# Supplementary material
Source: publisher figshare collection journal article supplement (https://gsajournals.figshare.com/articles/dataset/_/7011308)
Supplement: Supplementary file 1 [file 1]

ABL1	0.314937	2	1
ACBD3	0.349829	0	0
ACLY	0.16657	0	2
ADAM10	0.323658	0	0
ADNP	0.337353	31	2
AFF4	0.275431	0	0
AHCTF1	0.204331	0	1
AKAP13	0.34405	0	2
AKAP8	0.380547	0	0
ALDH18A1	0.289275	0	2
AMMECR1L	0.181764	0	0
ANKRD50	0.373353	0	1
AP1G1	0.305315	0	2
AQR	0.255588	0	1
ARID1A	0.182832	2	3
ARID1B	0.36046	43	4
ARID2	0.147678	3	1
ARID4B	0.308031	0	1
ARIH1	0.239927	1	2
ATAD2B	0.258615	0	1
ATF7IP	0.233256	0	2
BAZ1B	0.298911	0	2
BCL9	0.295961	2	0
BCOR	0.279004	1	1
BCORL1	0.33178	1	1
BMPR1A	0.211298	0	0
BRD1	0.036046	2	2
BRD2	0.362346	0	1
BRD3	0.245316	0	3
BRPF1	0.298039	4	1
BRWD1	0.277839	3	1
BRWD3	0.29655	1	2
BTAF1	0.187497	1	1
C10orf2	0.179701	0	0
C11orf30	0.213631	1	0
C16orf72	0.259524	0	0
C17orf85	0.168571	0	0
CAMSAP1	0.279472	0	1
CAPRIN1	0.26482	2	1
CASK	0.227716	5	6
CBLL1	0.297127	0	2
CBX1	0.272716	0	0
CCNJ	0.376658	0	0
CCNK	0.244812	0	0
CDC5L	0.381331	0	0
CDH2	0.237586	0	1
CGGBP1	0.32856	0	1
CHD1	0.338368	1	1
CHD4	0.15878	2	9
CHD8	0.362317	5	3
CHD9	0.184625	0	3
CHERP	0.365924	0	0
CHMP7	0.334635	1	0
CHSY1	0.316155	0	1
CKAP4	0.289903	0	0
CKAP5	0.275953	0	0
CLASP1	0.245115	0	4
CLPX	0.215361	0	1
CNOT1	0.328294	1	4
CNOT2	0.300786	1	0
COG3	0.353485	0	0
CORO1C	0.289154	0	0
CPSF6	0.240046	0	0
CPSF7	0.262057	0	2
CREB1	0.376651	0	1
CREBBP	0.364384	3	14
CRNKL1	0.381011	0	0
CSDE1	0.382461	0	1
CSNK1A1	0.334653	0	0
CSNK1E	0.247604	0	3
CSNK1G1	0.356787	0	0
CSNK2A1	0.201517	0	12
CSNK2A2	0.198168	0	1
CTR9	0.290713	2	3
CUL1	0.294954	1	1
CUL4A	0.356423	0	0
CXorf23	0.287234	0	1
DAZAP1	0.376179	0	2
DCAF5	0.229401	0	1
DCAF7	0.080895	0	2
DCP1A	0.204602	0	0
DCTN4	0.283902	0	0
DDB1	0.190982	0	2
DDX19A	0.287276	0	0
DDX21	0.346415	0	0
DDX23	0.252551	0	3
DDX3X	0.326722	24	13
DDX42	0.366336	0	1
DDX46	0.321522	1	0
DDX6	0.18264	0	0
DHX15	0.338403	0	1
DHX8	0.351656	0	1
DHX9	0.364035	0	2
DIDO1	0.179692	0	4
DIS3L2	0.359515	0	3
DOCK7	0.293923	0	3
DYRK1A	0.294334	17	5
EFTUD2	0.179796	2	4
EHMT1	0.12263	9	4
EIF2S3	0.32256	0	0
EIF3A	0.235279	0	1
ELF2	0.271394	0	0
ENAH	0.280215	0	0
EP300	0.272732	14	6
EPC1	0.206653	0	0
EPC2	0.233526	0	0
EWSR1	0.300756	0	0
FAF1	0.312959	0	0
FAF2	0.222869	0	1
FAM115A	0.367152	0	0
FBXO11	0.340349	4	5
FBXO21	0.109469	0	2
FBXO38	0.238353	0	2
FBXO42	0.203748	0	0
FCHSD2	0.196008	1	0
FOXK2	0.313028	0	2
FUBP1	0.325467	0	0
GCN1L1	0.23561	0	2
GIGYF2	0.301224	1	3
GMEB1	0.192564	0	0
GSK3B	0.374296	0	1
GSPT1	0.250686	0	1
GTF2A1	0.343024	0	0
GTF2I	0.248727	0	0
GTF2IRD1	0.345417	0	2
GTF3C1	0.363829	1	3
GTF3C2	0.136594	0	1
GTPBP1	0.069587	0	0
GTPBP4	0.375164	0	1
HIF1A	0.298846	0	0
HMG20A	0.247111	0	0
HNRNPA0	0.335535	0	0
HNRNPH1	0.373073	0	0
HNRNPR	0.35617	0	2
HNRNPU	0.291351	7	2
HNRNPUL1	0.218548	0	1
IGF2R	0.342568	0	4
ILF3	0.192607	0	0
IPO9	0.355458	1	2
IREB2	0.351487	0	1
ISG20L2	0.150437	0	0
IWS1	0.280088	0	0
KBTBD2	0.209914	0	0
KDM2B	0.290284	0	4
KDM3B	0.17142	1	1
KDM4A	0.279642	0	0
KDM5A	0.187567	0	0
KDM6A	0.251125	2	3
KHDRBS1	0.314927	0	0
KHSRP	0.148267	1	0
KIAA0947	0.382239	0	1
KIAA1429	0.373996	0	1
KIF2A	0.371542	0	2
KPNA3	0.317941	0	0
KPNA4	0.340368	0	0
KPNB1	0.251746	0	0
LASP1	0.313111	0	1
LATS1	0.181568	0	0
LDB1	0.196011	2	0
LEO1	0.329381	2	1
LRP6	0.378261	1	0
LSM14B	0.257268	0	0
MAP3K7	0.282027	0	2
MBTD1	0.321569	0	0
MCM3AP	0.317358	0	0
MDM2	0.308215	0	1
MED1	0.352066	0	0
MED12	0.252929	3	6
MED13	0.191108	1	2
MED14	0.321428	0	1
MEX3C	0.17645	0	0
MGA	0.211463	0	3
MKRN1	0.112422	0	0
MLLT10	0.170885	0	0
MORC2	0.203766	0	6
MSL1	0.315858	0	0
MSL2	0.127947	1	1
MTA1	0.37743	1	1
MTA2	0.273236	0	1
MTMR1	0.220529	0	0
MTMR3	0.25063	1	1
MYEF2	0.367475	0	0
NCBP1	0.291774	0	0
NCL	0.375652	1	0
NCOA3	0.247836	0	2
NCOA5	0.317783	0	0
NCOA6	0.33439	1	0
NEDD4L	0.097702	0	2
NIPBL	0.172117	1	3
NRF1	0.117662	0	1
NSD1	0.267263	7	4
NUP153	0.303383	0	0
NUP155	0.222893	0	0
NUP188	0.249671	0	2
NUP214	0.264188	0	1
NUP62	0.116217	0	0
NUP98	0.340958	0	1
OSBP	0.369376	0	1
OSBPL11	0.228851	0	0
OXSR1	0.31779	1	0
PA2G4	0.381869	1	0
PABPC4	0.171547	0	0
PAK2	0.305807	0	0
PATL1	0.193834	0	2
PATZ1	0.215444	0	1
PBRM1	0.257893	0	1
PCBP2	0.369113	0	0
PCF11	0.237134	0	0
PCYT1B	0.300008	0	0
PDS5A	0.317798	0	1
PHC1	0.253187	0	0
PHF12	0.187932	2	1
PHF13	0.171816	0	1
PHF16	0.322929	0	0
PHF2	0	2	1
PHF20	0.350421	0	0
PHF21A	0.161512	2	0
PHF3	0.188814	1	2
PJA1	0.309141	0	0
PKNOX1	0.206902	0	0
POGK	0.147022	0	0
POGZ	0.208712	16	5
POLDIP3	0.173514	0	0
POLR1A	0.309453	0	1
POLR1B	0.359687	0	0
PPM1G	0.348448	0	0
PPP1R8	0.372533	0	0
PPP2R5E	0.29231	0	1
PPP4R1	0.267993	0	0
PRCC	0.382722	0	0
PRKAR2A	0.251544	0	0
PRKDC	0.225371	0	4
PRPF4	0.166186	0	1
PRPF4B	0.245671	0	0
PRPF8	0.234722	0	6
PSMD11	0.223651	0	0
PSME4	0.296679	0	3
PSPC1	0.256551	0	0
PTPN9	0.155654	0	1
PUM1	0.347045	1	1
PUM2	0.221943	2	2
PWWP2A	0.283004	0	0
PYGO1	0.352564	0	0
QRICH1	0.206096	4	0
RAD23B	0.29944	0	1
RAD54L2	0.339547	0	2
RAF1	0.169865	0	1
RBL2	0.298071	0	3
RBM15B	0.304174	0	1
RBM22	0.270692	0	0
RBM26	0.266156	0	1
RBM27	0.202446	0	3
RCOR1	0.155661	0	0
REPS1	0.369842	0	0
RFX7	0.202255	2	2
RLF	0.241412	1	1
RNF111	0.363133	1	0
RNF214	0.211779	0	2
RNF38	0.266237	1	1
RNF40	0.17599	0	2
RNGTT	0.36641	0	0
RPRD2	0.29778	1	1
RPS6KB1	0.273279	0	0
RSF1	0.250453	0	2
RSPRY1	0.164534	0	0
RTF1	0.337346	0	1
SAFB	0.120147	1	0
SAP130	0.24505	1	0
SEC24B	0.182074	0	1
SEC24C	0.161668	0	0
SENP1	0.316397	0	0
SENP7	0.254486	0	2
SETD2	0.252698	5	2
SETD5	0.37938	16	5
SETDB1	0.208193	0	2
SF1	0.079559	2	5
SF3A1	0.124204	0	0
SF3B1	0.207553	0	5
SF3B2	0.223986	0	2
SF3B3	0.247385	0	1
SFMBT1	0.215815	0	0
SFPQ	0.323799	0	1
SIAH1	0.37368	0	2
SIN3A	0.331136	3	3
SIRT1	0.334732	0	2
SLAIN2	0.316703	0	0
SLC7A6OS	0.378541	0	0
SMAD1	0.367806	0	0
SMAD4	0.346353	0	5
SMARCA4	0.093707	0	12
SMARCC2	0.240347	2	2
SMARCD1	0.203344	1	2
SMEK1	0.251993	0	1
SMG6	0.261879	0	3
SMURF2	0.304935	1	0
SNRNP200	0.139664	0	3
SON	0.236864	4	2
SP4	0.216154	0	1
SPATS2	0.224476	1	0
SSH2	0.346758	0	1
SSRP1	0.300403	0	1
STAU1	0.362335	0	0
SUFU	0.083727	1	0
SUPT16H	0.330921	1	1
SUV420H1	0.27025	6	2
TAF1	0.250199	0	6
TAF4	0.176536	1	0
TAF5	0.33902	0	0
TAF5L	0.238521	0	0
TARDBP	0.302418	0	0
TCERG1	0.193288	0	1
TCF20	0.290274	9	2
TERF2	0.280042	0	0
TIAL1	0.262028	0	1
TLK2	0.332515	3	5
TNKS	0.297088	1	1
TOP1	0.373906	0	0
TOPBP1	0.333482	0	0
TOPORS	0.260418	0	2
TPP2	0.271428	0	1
TPR	0.224103	0	2
TRIM24	0.278152	0	0
TRIM33	0.311365	0	0
TRIP12	0.321063	6	2
TRRAP	0.329361	0	10
TTC17	0.220462	0	2
U2AF2	0.321227	0	4
UBA6	0.355586	0	0
UBAP2L	0.215984	1	2
UBE2H	0.26778	0	1
UBE2R2	0.2354	0	0
UBE4B	0.267402	0	1
UBR5	0.232286	1	4
UBTD2	0.279623	0	0
UBTF	0.169158	1	2
UCK2	0.073889	0	0
UHRF2	0.366657	0	0
USP10	0.304958	0	1
USP22	0.294193	0	1
USP24	0.178481	0	3
USP42	0.166877	0	1
USP47	0.267498	0	1
VEZF1	0.344956	2	2
WAPAL	0.244603	0	0
WDR26	0.340645	2	2
WDR33	0.339868	0	0
WDR48	0.294697	0	1
WDR5	0.168401	0	1
WDR82	0.233721	0	1
WHSC1L1	0.333615	0	0
WTAP	0.370768	0	0
XPO5	0.305636	0	0
XPO7	0.344363	0	0
YEATS2	0.285125	0	0
YLPM1	0.239241	0	2
YTHDC1	0.22789	2	1
YTHDF1	0.317767	0	1
YTHDF2	0.261684	0	0
YY1	0.132964	2	1
ZBED4	0.164581	0	0
ZBTB10	0.354309	2	0
ZBTB2	0.085846	0	0
ZC3H14	0.210796	1	0
ZC3H18	0.246899	1	0
ZC3H4	0.354103	1	1
ZC3H6	0.321744	0	0
ZC3H7A	0.230257	0	1
ZC4H2	0.199161	3	1
ZCCHC11	0.126349	0	0
ZCCHC6	0.27171	0	2
ZCCHC8	0.256986	0	0
ZMYM2	0.295661	2	0
ZMYM4	0.308118	1	1
ZNF131	0.311682	0	0
ZNF146	0.09976	0	1
ZNF182	0.233999	0	0
ZNF280C	0.244177	0	0
ZNF281	0.359215	0	0
ZNF292	0.275089	2	3
ZNF346	0.23069	0	0
ZNF398	0.221556	0	3
ZNF445	0.21701	0	2
ZNF496	0.116679	0	0
ZNF507	0.315101	0	0
ZNF512	0.272012	0	1
ZNF532	0.123742	0	1
ZNF605	0.371071	0	0
ZNF609	0.229425	1	2
ZNF711	0.314156	0	1
ZRANB1	0.339997	0	3
ZZZ3	0.235742	0	1
